# Supplementary material for: Neomycin loaded by tetrahedral framework nucleic acids enhances antimicrobial sensitivity against bacteria
Source: Royal Society of Chemistry journal article supplement (doi:10.1039/d5nr01239b), 2025-01-01
Supplement: d5nr01239b1.pdf [file d5nr01239b1.pdf]

## Supporting Information

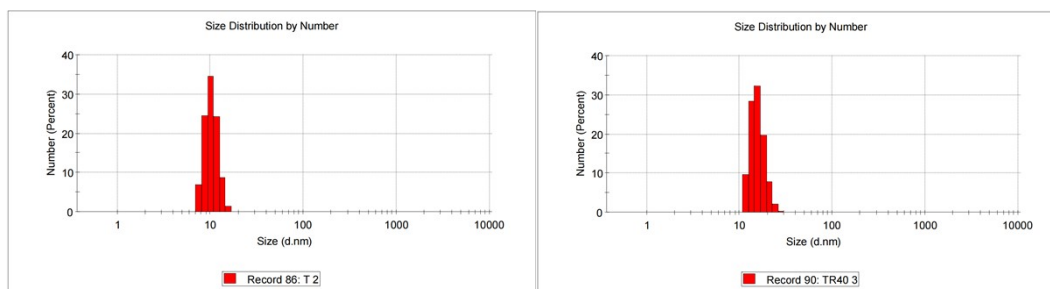

**Figure S1.** Some results of the dynamic light scattering assay.

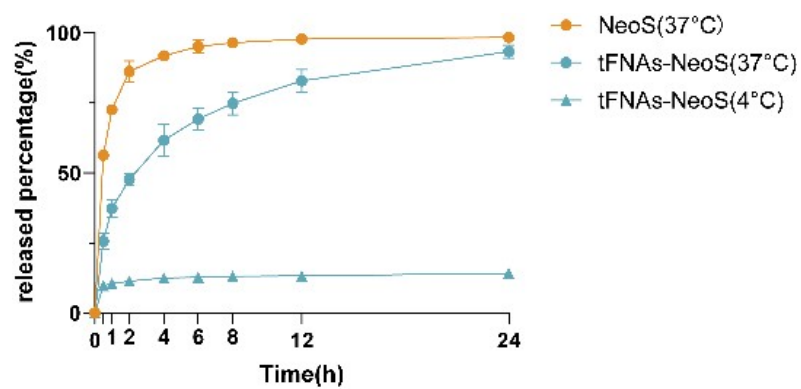

**Figure S2.** Drug release kinetics.

| The minimal inhibition concentration (MIC) results of (tFNAs+NeoS) |                                                |     |     |     |     |     |     |   |    |
|--------------------------------------------------------------------|------------------------------------------------|-----|-----|-----|-----|-----|-----|---|----|
| Group                                                              | Concentration of Neomycin Sulfate( $\mu$ g/ml) |     |     |     |     |     |     |   |    |
|                                                                    | 0.2                                            | 0.4 | 0.8 | 1.2 | 1.6 | 2.0 | 2.5 | 5 | 10 |
| <i>Escherichia coli</i>                                            | +                                              | +   | +   | +   | +   | +   | +   | - | -  |
| <i>Staphylococcus aureus</i>                                       | +                                              | +   | +   | +   | +   | +   | -   | - | -  |
| (-): Without bacteria growth; (+): With bacteria growth            |                                                |     |     |     |     |     |     |   |    |

**Figure S3.** MIC results to exclude the possibility of synergistic effects.

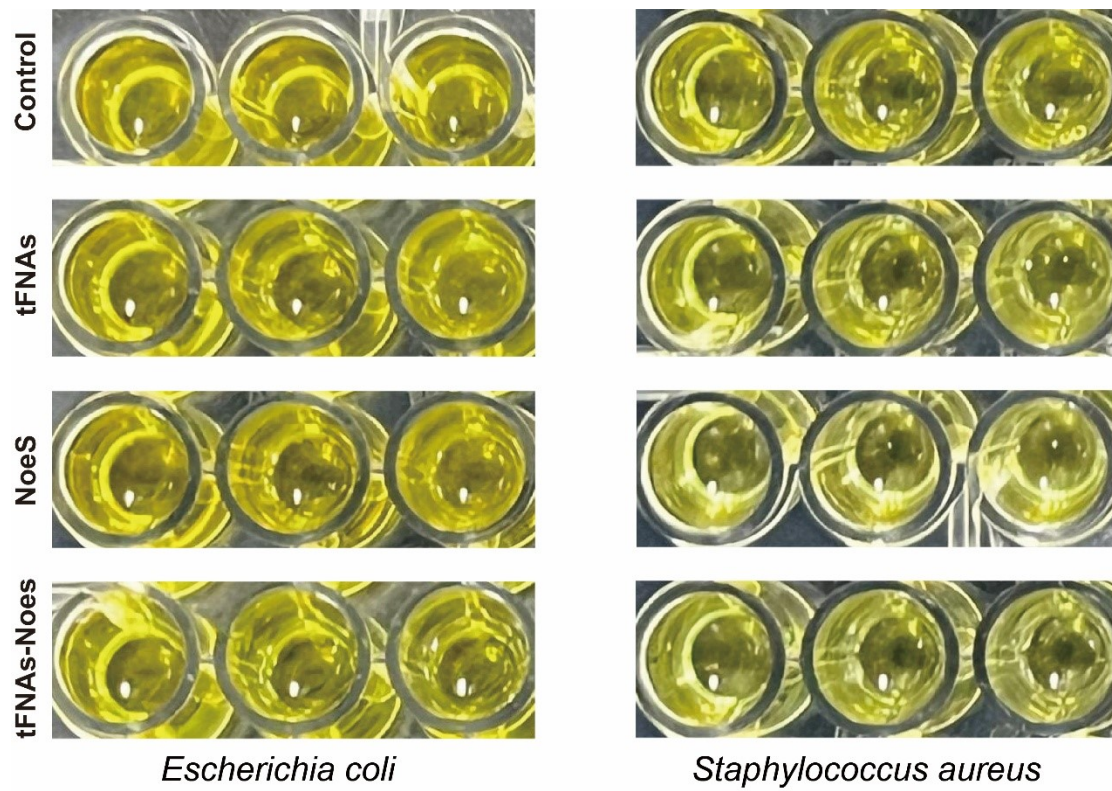

**Figure S4.** Photos of ONPG test to explore leakage of  $\beta$ -galactosidase.

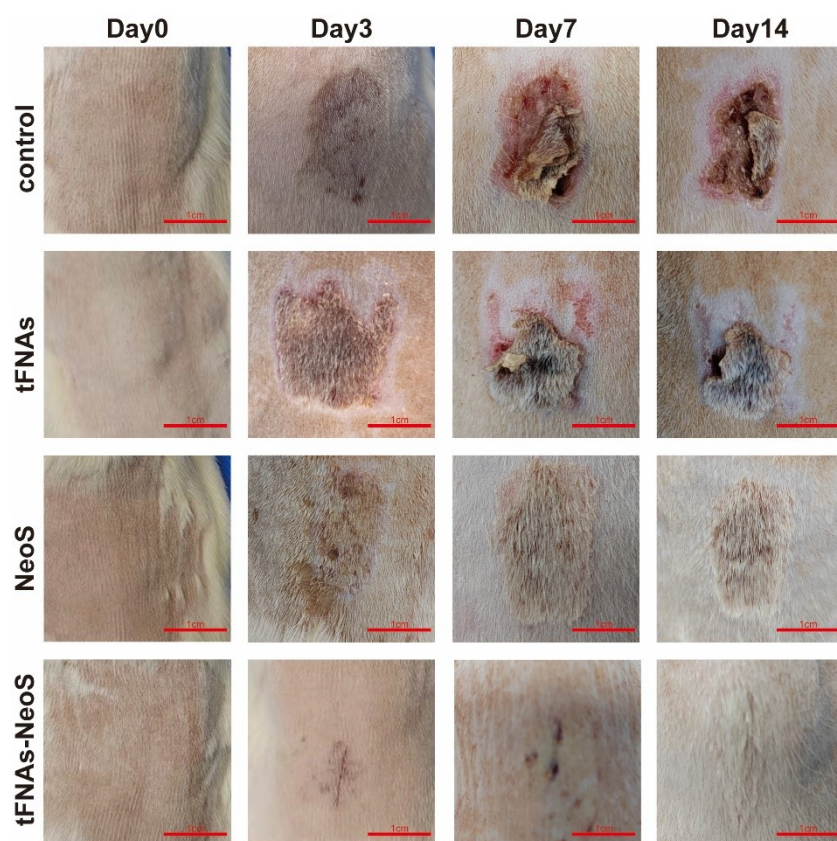

**Figure S5.** Photos of burn wounds.

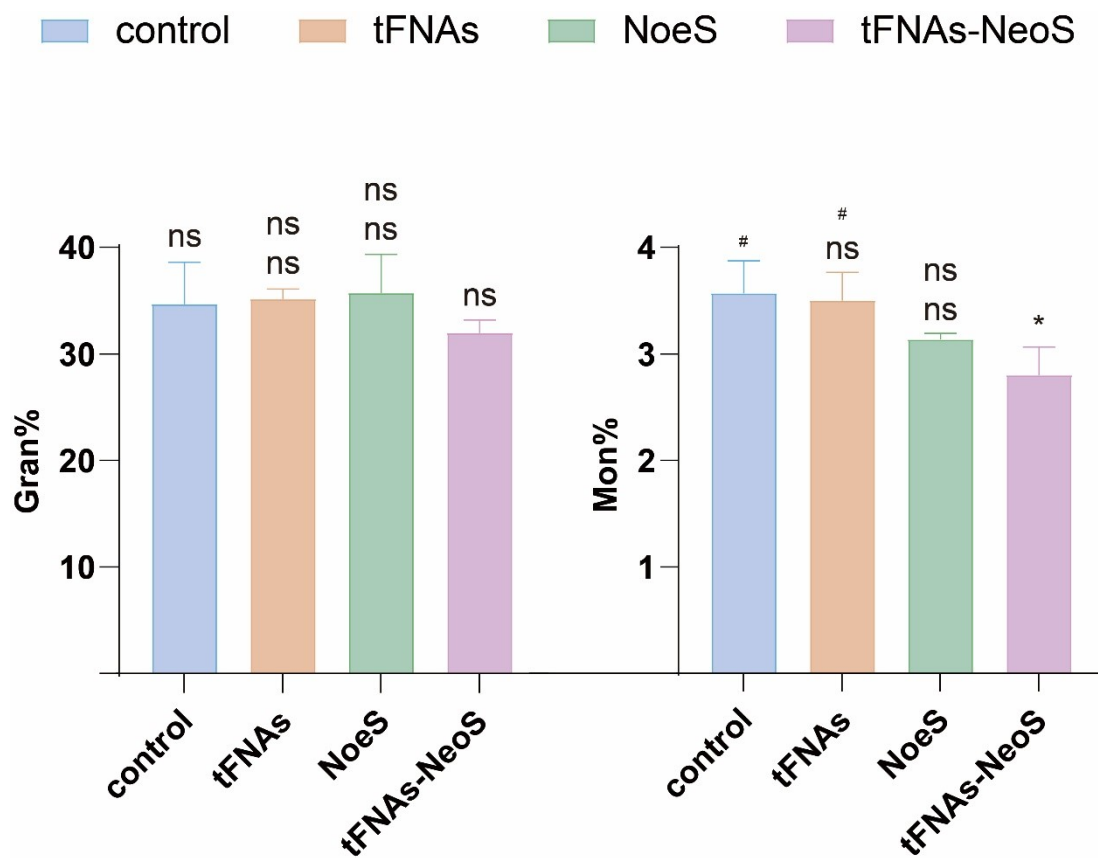

**Figure S6.** Other blood routine results of rats.

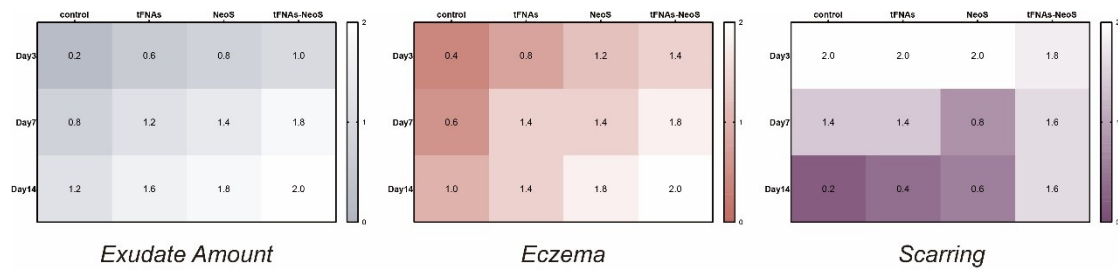

**Figure S7.** Other heat maps of wound scores.
